# Supplementary material for: Hierarchical assembly of SnO2 nanowires on MnO2 nanosheets: a novel 1/2D hybrid architecture for high-capacity, reversible lithium storage
Source: Royal Society of Chemistry journal article supplement (doi:10.1039/c5ta00266d), 2015-01-01
Supplement: c5ta00266d1.pdf [file c5ta00266d1.pdf]

*Supplementary Information*

**Hierarchical assembly of SnO<sub>2</sub> nanowires on MnO<sub>2</sub> nanosheets: a novel 1/2D hybrid architecture for high-capacity, reversible lithium storage**

*Long Pan,<sup>a</sup> Ke-Xin Wang,<sup>c</sup> Xiao-Dong Zhu,<sup>\*b</sup> Xu-Ming Xie<sup>\*a</sup> and Yi-Tao Liu<sup>\*a</sup>*

<sup>a</sup>Key Laboratory of Advanced Materials (MOE), Department of Chemical Engineering, Tsinghua University,  
Beijing 100084, China

<sup>b</sup>Academy of Fundamental and Interdisciplinary Sciences, Harbin Institute of Technology,  
Harbin 150080, China

<sup>c</sup>Department of Chemistry, Harbin Institute of Technology, Harbin 150001, China

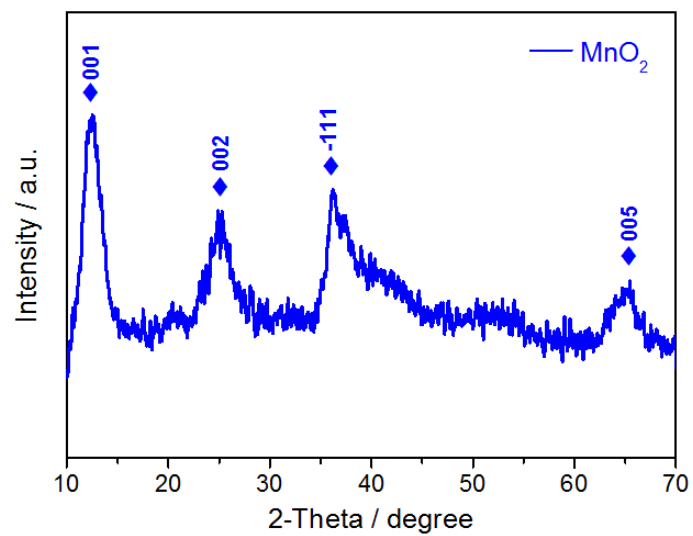

**Fig.S1** XRD pattern of MnO<sub>2</sub> nanosheets showing four well-resolved peaks (001, 002, -111 and 005) of  $\delta$ -MnO<sub>2</sub> (JCPDS card No. 80-1098).

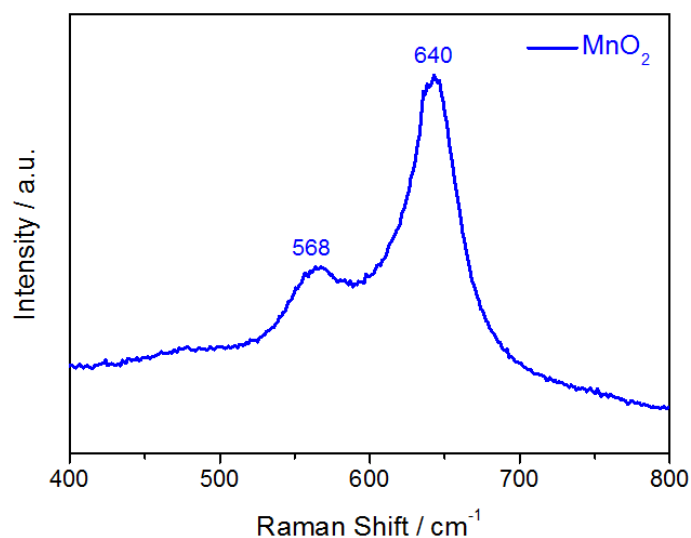

**Fig.S2** Raman spectrum of MnO<sub>2</sub> nanosheets showing two well-resolved peaks. Note that the peak at the higher wavenumber can be attributed to the symmetric stretching vibration  $\nu_2(\text{Mn-O})$  of MnO<sub>6</sub> groups, while the peak at the lower wavenumber can be attributed to the  $\nu_3(\text{Mn-O})$  stretching vibration in the basal plane of [MnO<sub>6</sub>] sheets.<sup>1-3</sup>

- 1 J. Zhou, L. Yu, M. Sun, S. Yang, F. Ye, J. He and Z. Hao, *Ind. Eng. Chem. Res.*, 2013, **52**, 9586.
- 2 C. Julien, M. Massot, R. Baddour-Hadjean, S. Franger, S. Bach and J. P. Pereira-Ramos, *Solid State Ionics*, 2003, **159**, 345.
- 3 A. K. Sinha, M. Pradhan and T. Pal, *J. Phys. Chem. C*, 2013, **117**, 23976.

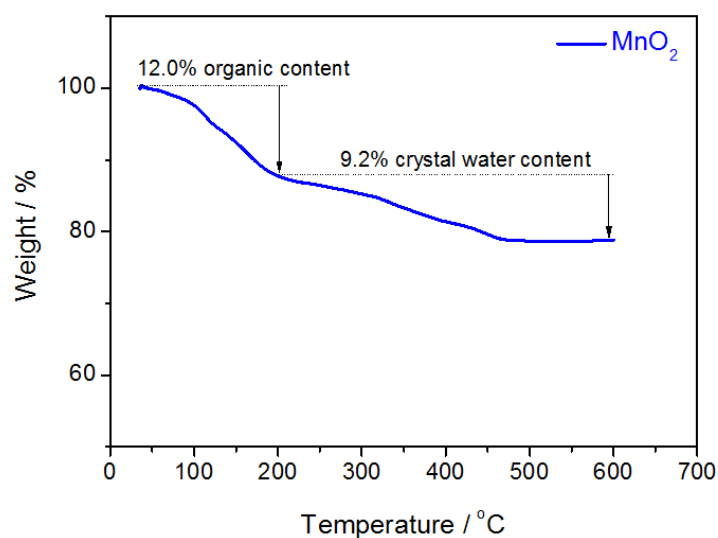

**Fig.S3** TGA curve of MnO<sub>2</sub> nanosheets showing 12.0 wt% organic content and 9.2 wt% crystal water content. Note that our K<sup>+</sup>-intercalated MnO<sub>2</sub> nanosheets have a chemical formula of K<sub>0.46</sub>Mn<sub>1.54</sub>Mn<sub>0.46</sub>O<sub>4</sub>·1.4H<sub>2</sub>O,<sup>1</sup> corresponding to a theoretical crystal water content of 11.6 wt%. The actual crystal water content is calculated to be 10.4 wt% when we take into account the 12.0% organic content, which is in agreement with the theoretical value.

1 A. K. Sinha, M. Pradhan and T. Pal, *J. Phys. Chem. C*, 2013, **117**, 23976.

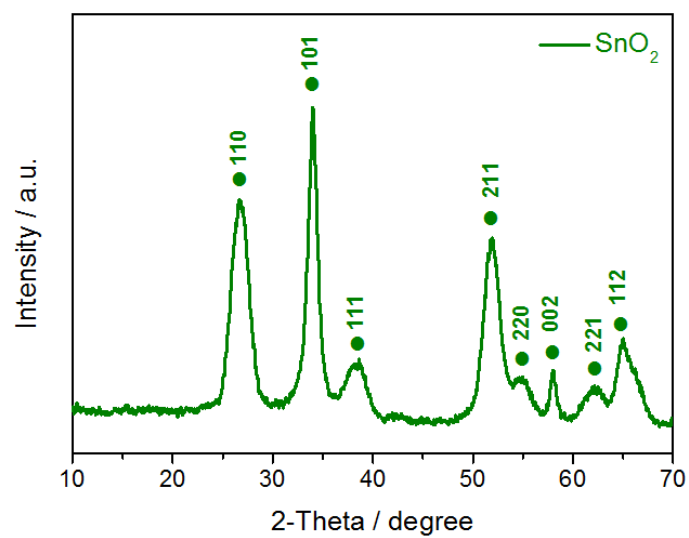

**Fig.S4** XRD pattern of SnO<sub>2</sub> nanowires showing eight well-resolved peaks (110, 101, 111, 211, 220, 002, 221 and 112) of rutile SnO<sub>2</sub> (JCPDS card No. 41-1445).

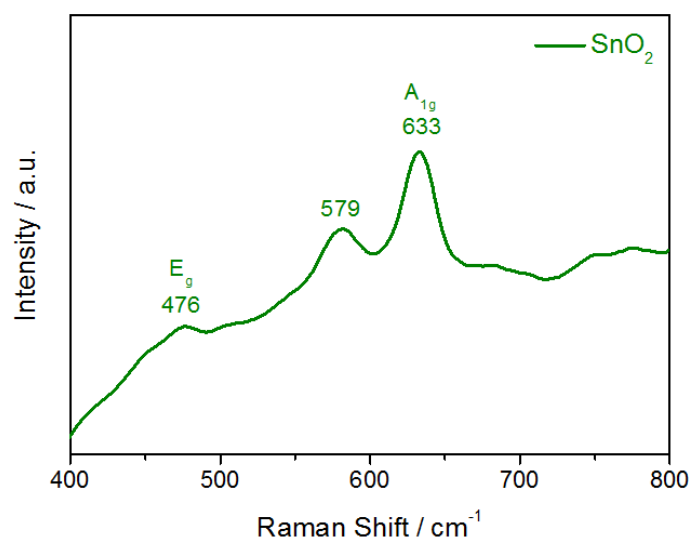

**Fig.S5** Raman spectrum of SnO<sub>2</sub> nanowires showing three well-resolved peaks. Note that the peak at 579 nm related to the facet surface area of a crystal arises from nanoscale SnO<sub>2</sub> with small grain sizes.<sup>1</sup>

1 B. Cheng, J. M. Russell, W. Shi, L. Zhang and E. T. Samulski, *J. Am. Chem. Soc.*, 2004, **126**, 5972.

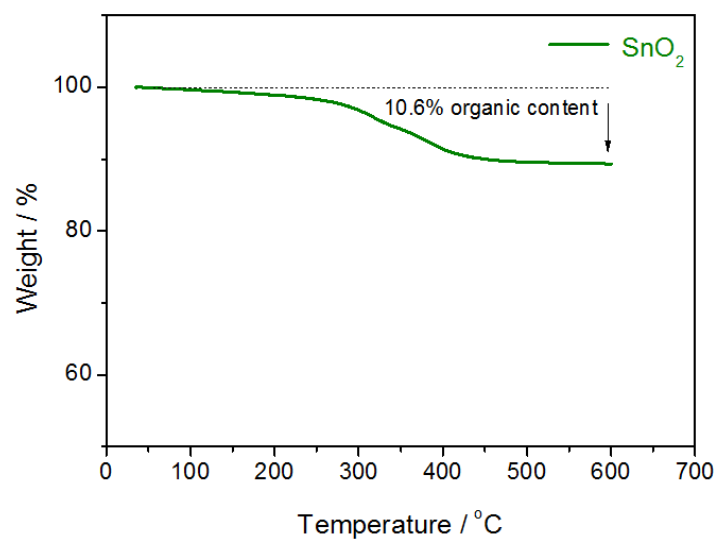

**Fig.S6** TGA curve of SnO<sub>2</sub> nanowires showing 10.6 wt% organic content.

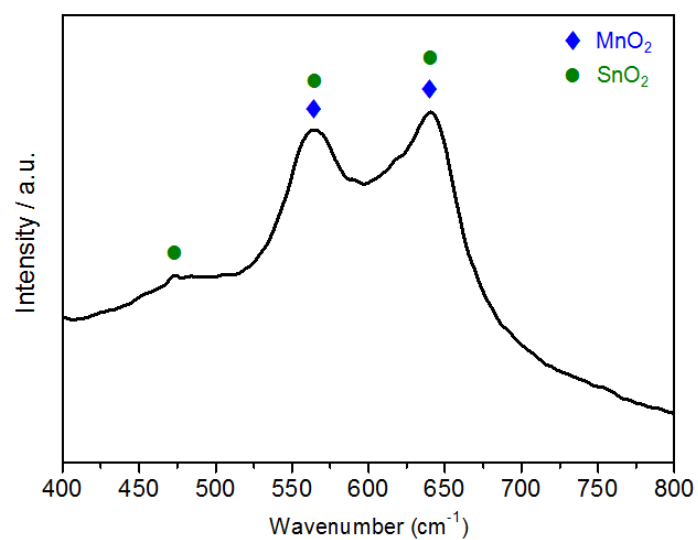

**Fig.S7** Raman spectrum of SnO<sub>2</sub>/MnO<sub>2</sub> 1/2D hybrid architecture. The circles and diamonds indicate the characteristic peaks of SnO<sub>2</sub> nanowires and MnO<sub>2</sub> nanosheets, respectively, with a certain degree of superposition (550–650 cm<sup>-1</sup>) due to their very close peak positions.



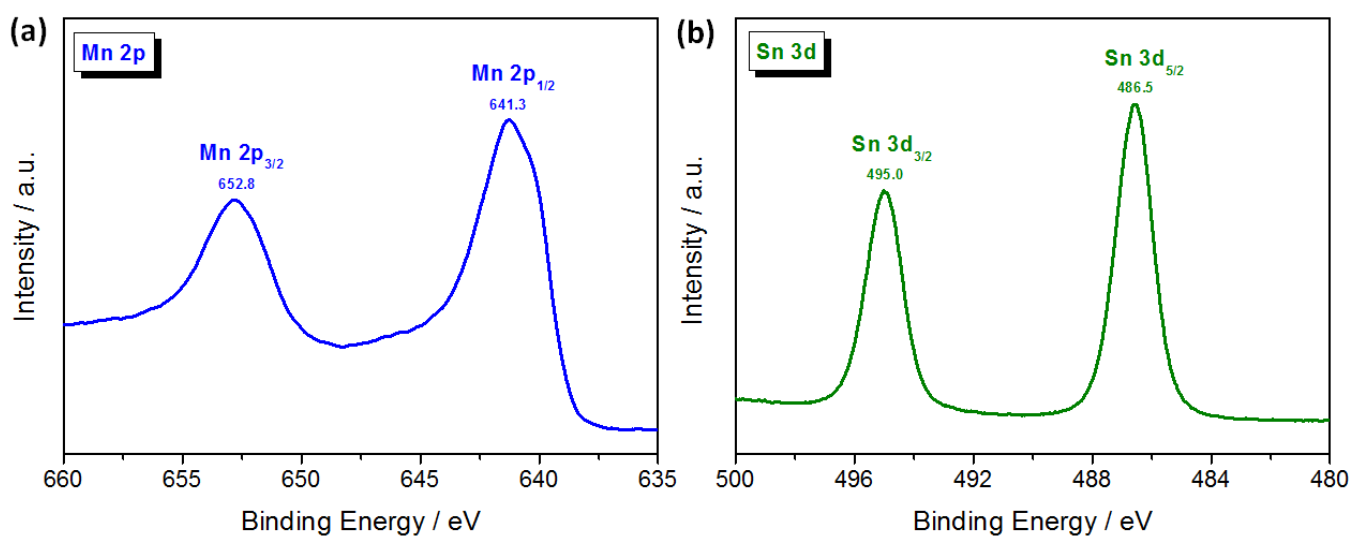

**Fig.S8** (a) Mn 2p and (b) Sn 3d XPS spectra of SnO<sub>2</sub>/MnO<sub>2</sub> 1/2D hybrid architecture. In the binding energy range of 660–635 eV, the two peaks at 652.8 and 641.3 eV are assigned to Mn 2p<sub>1/2</sub> and 2p<sub>3/2</sub> orbitals, indicating the Mn(IV) state in the SnO<sub>2</sub>/MnO<sub>2</sub> 1/2D hybrid architecture without any alterations.<sup>1</sup> As to the XPS spectrum of SnO<sub>2</sub> in the energy range of 500–480 eV, the two peaks at 495.0 and 486.5 eV correspond to Sn 3d<sub>3/2</sub> and 3d<sub>5/2</sub> orbitals, demonstrating that the Sn atoms are in the form of SnO<sub>2</sub>.<sup>2–5</sup>

- 1 A. K. Sinha, M. Pradhan and T. Pal, *J. Phys. Chem. C*, 2013, **117**, 23976.
- 2 B. Zhang, Q. B. Zheng, Z. D. Huang, S. W. Oh and J. K. Kim, *Carbon*, 2011, **49**, 4524.
- 3 C. Tan, J. Cao, A. M. Khattak, F. Cai, B. Jiang, G. Yang and S. Hu, *J. Power Sources*, 2014, **270**, 28.
- 4 X. Wang, X. Cao, L. Bourgeois, H. Guan, S. Chen, Y. Zhong, D.-M. Tang, H. Li, T. Zhai, L. Li, Y. Bando and D. Golberg, *Adv. Funct. Mater.*, 2012, **22**, 2682.
- 5 L. Wang, D. Wang, Z. Dong, F. Zhang and J. Jin, *Nano Lett.*, 2013, **13**, 1711.

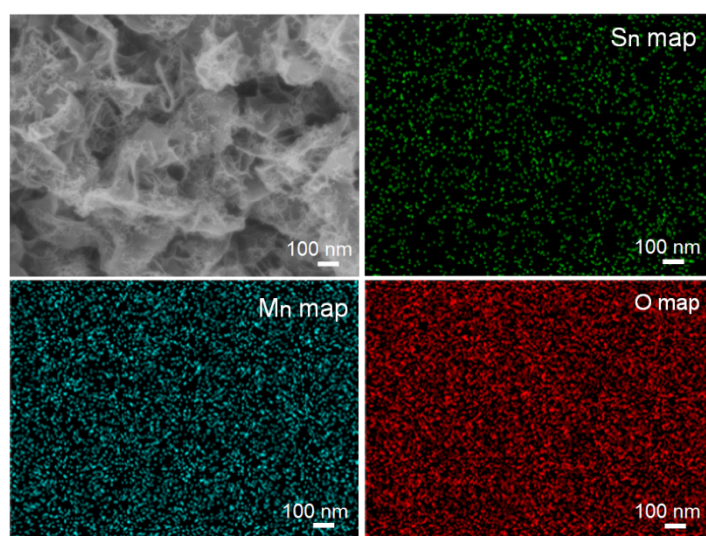

**Fig.S9** SEM image of SnO<sub>2</sub>/MnO<sub>2</sub> 1/2D hybrid architecture and the corresponding EDS maps showing a homogeneous distribution of Mn, Sn and O elements.

**Table S1** – Elemental composition of SnO<sub>2</sub>/MnO<sub>2</sub> 1/2D hybrid architecture.

|                | Mn<br>(wt%) | Sn<br>(wt%) | MnO <sub>2</sub><br>(wt%) | SnO <sub>2</sub><br>(wt%) |
|----------------|-------------|-------------|---------------------------|---------------------------|
| Actual ratio   | 27.07       | 1.34        | 60.78                     | 39.22                     |
| Starting ratio | –           | –           | 60                        | 40                        |

<sup>a)</sup>Note that SnO<sub>2</sub> nanowires cannot be completely dissolved in concentrated H<sub>2</sub>SO<sub>4</sub> at ambient temperature, so their accurate composition is calculated by subtracting that of MnO<sub>2</sub> nanosheets from 100 wt%. Quantitatively, the content of MnO<sub>2</sub> nanosheets is calculated by considering the organic and crystal water contents, and is 60.78 wt%. Therefore, the content of SnO<sub>2</sub> nanowires is 39.22 wt%. These values agree well with their starting ratio which again confirm a quite high self-assembly efficiency.

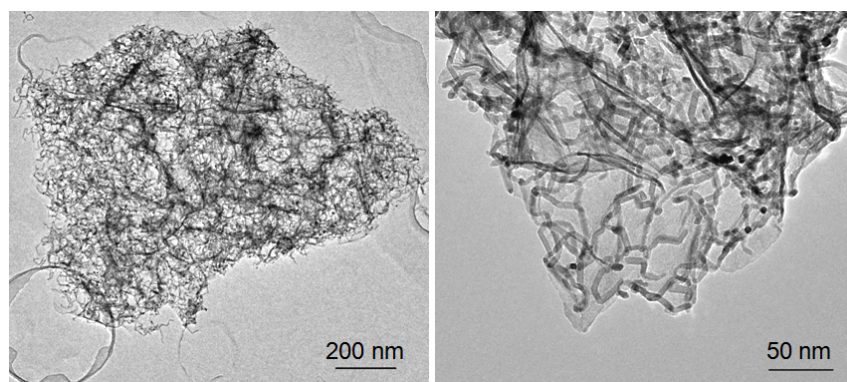

**Fig.S11** TEM images of SnO<sub>2</sub>/MnO<sub>2</sub> 1/2D hybrid architecture after 200 charging–discharging cycles at a current density of 200 mA g<sup>-1</sup>. It can be seen that after repeated lithation/delithation, the SnO<sub>2</sub>/MnO<sub>2</sub> 1/2D hybrid architecture still preserves its original morphology without stacking or collapsing.

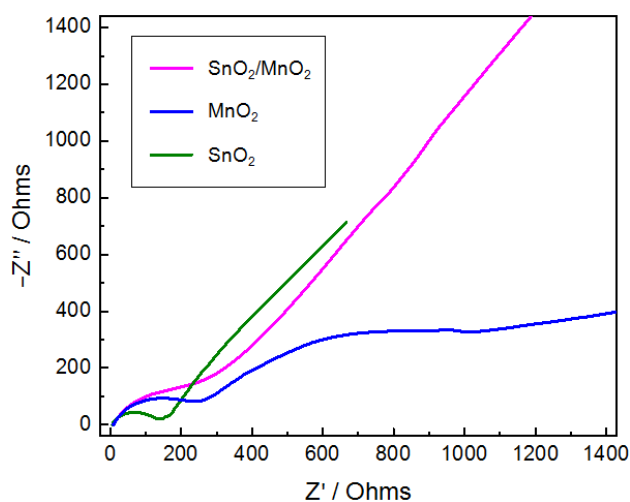

**Fig. S12** Nyquist plots of SnO<sub>2</sub>/MnO<sub>2</sub> 1/2D hybrid architecture as well as neat MnO<sub>2</sub> nanosheets and SnO<sub>2</sub> nanowires from 100 kHz to 0.01 Hz. The diameter of the semicircle for the SnO<sub>2</sub> nanowires, corresponding to the charge transfer resistance ( $R_{ct}$ ), is much smaller than that of the MnO<sub>2</sub> nanosheets, demonstrating the higher conductivity of the former.
